# Supplementary material for: Preparation of mesoporous silica nanosheets through electrospinning: a novel scroll mechanism
Source: Royal Society of Chemistry journal article supplement (doi:10.1039/c3ra47504b), 2014-01-01
Supplement: c3ra47504b1.pdf [file c3ra47504b1.pdf]

# Preparation of mesoporous silica nanosheets through electrospinning: a novel scroll mechanism

Jingyi Shen, Yi-nan Wu, Bingru Zhang and Fengting Li \*

*College of Environmental Science and Engineering, State Key Laboratory of Pollution Control and Resource Reuse, Tongji University, 1239 Siping Road, Shanghai, China.*

*\* Corresponding author.*

*E-mail: fengting@tongji.edu.cn; Fax: +86-21-65985059 ; Tel: +86-21-65983121.*

## Electronic Supplementary Information (ESI)

|                                                                   |          |
|-------------------------------------------------------------------|----------|
| <i>Reagents and materials.....</i>                                | <i>2</i> |
| <i>Preparation of silica precursor sols.....</i>                  | <i>2</i> |
| <i>Preparation of PVP/SiO<sub>2</sub> nanofibers.....</i>         | <i>2</i> |
| <i>Preparation of SiO<sub>2</sub> nanosheets.....</i>             | <i>3</i> |
| <i>Characterization.....</i>                                      | <i>3</i> |
| <i>Figures and experimental data.....</i>                         | <i>4</i> |
| <i>Fig. S1 Molecular structures of dendrimers.....</i>            | <i>4</i> |
| <i>Fig. S2 Photograph of the product before calcination.....</i>  | <i>4</i> |
| <i>Fig. S3 The electrospinning process.....</i>                   | <i>5</i> |
| <i>Fig. S4 Photograph of the product after calcination.....</i>   | <i>5</i> |
| <i>Table S1 Nitrogen adsorption-desorption isotherm data.....</i> | <i>6</i> |
| <i>Table S2 BJH desorption pore distribution</i>                  |          |
| <i>data.....</i>                                                  | <i>8</i> |

### ***Reagents and materials***

Polyvinylpyrrolidone (PVP,  $M_w$  1,300,000), polyamidoamine dendrimers  $C_{22}H_{48}N_{10}O_4$  (PAMAM-0G, 20% solution in methanol) and  $C_{62}H_{128}N_{26}O_{12}$  (PAMAM-1G, 20% solution in methanol) were purchased from Sigma-Aldrich. Tetraethyl orthosilicate (TEOS,  $SiO_2\%$  = 28.4) and ethanol (99.7%) were provided by Sinopharm Chemical Reagent Co., China. PAMAM-0G and 1G were treated by removing methanol solvent using vacuum distillation before use, other chemicals were used without further purification. Deionized water was used throughout this work. Molecular structures of PAMAM-0G and 1G are illustrated with Fig. S1.

### ***Preparation of silica precursor sols***

Magnetic stirring was applied throughout this part. In a typical process in this work, 0.034 g PAMAM-1G was dropped into a mixed solvent containing 22 mL ethanol and 2 mL water. After PAMAM was fully dissolved, 1.6 g PVP was added to the mixture. The viscosity of solution became higher and higher during dissolution. A total content of 3.0 g TEOS was added dropwise to the system after the polymer was completely dissolved. Stirring was continued for another 30 min, thus the silica precursor sol was obtained. Various contents of TEOS ranging from 0.3 g to 4.0 g, and the zero-generation PAMAM were employed to form different sols. For a comparison, no structuring agent was utilized in the blank experiment. Moreover, polymer was not used in another comparison experiment in order to obtain a normal silica sol.

### ***Preparation of PVP/SiO<sub>2</sub> nanofibers***

The as-prepared precursor sol was moved to a plastic syringe with a metal nozzle, of which the inner diameter was 1.2 mm. A high voltage of 18 kV was applied to the nozzle to start the electrospinning process. The distance between the nozzle and the counter electrode was 20 cm. During electrospinning, the sol was pushed out the syringe by a pump at a constant rate of 0.8 mL  $h^{-1}$ . The deformed drops converted into ultrathin fibers when they touched the high voltage. The fibers were collected on the counter electrode covered with aluminum foil. Then, they were dried at 60 °C for 24 h under vacuum, as the PVP/SiO<sub>2</sub> nanofibers (see Fig. S2). The normal silica sol did not experience this procedure. The electrospinning process is illustrated with Fig. S3.

### ***Preparation of SiO<sub>2</sub> nanosheets***

The fibers were calcined in air in order to remove the coexisted polymer and template. The procedures of calcination were as follows. First, the chamber temperature was increased from 30 °C to 100 °C with the rate of 2 °C min<sup>-1</sup>. Then, the nanofibers were heat-treated at the rate of 5 °C min<sup>-1</sup> to 500 °C and held at this temperature for 6 h. After a spontaneous cooling procedure to room temperature, the mesoporous silica nanosheets were obtained (see Fig. S4). On the other hand, the normal silica sol was kept static until it formed a gel. The gel was dried at 80 °C under vacuum for 24 h. A xerogel was thus obtained and calcined later through the identical procedures mentioned above.

### ***Characterization***

Scanning electron microscopy (SEM) measurements were taken on a Philips XL-30 scanning electron microscope. Transmission electron microscopy (TEM) experiments were performed on a FEI Tecnai G2 F20 S-TWIN electron microscope. Wide-angle X-ray diffraction (WAXD) pattern of the adsorbent sample was recorded using an X-ray diffractometer (Bruker D8 Advance) at 40 kV and at a current of 40 mA with Cu K $\alpha$  radiation. Low-angle X-ray diffraction pattern of the adsorbent sample was recorded using a Rigaku RINT2000 vertical goniometer at 40 kV and at a current of 50 mA with Cu K $\alpha$  radiation. The nitrogen adsorption and desorption isotherms were measured using a Micromeritics ASAP 2020 analyzer at 77 K. The Brunauer-Emmett-Teller (BET) method was utilized to calculate the specific surface area. The pore volume and pore size distribution were derived by using the Barrett-Joyner-Halenda (BJH) model.

Physicochemical parameters of the as-prepared materials are defined as follows: mesopore surface area ( $S_{\text{meso}}$ , m<sup>2</sup> g<sup>-1</sup>) was calculated using BJH method from the desorption branches; total pore volume ( $V_{\text{total}}$ , cm<sup>3</sup> g<sup>-1</sup>) was measured at  $P/P_0 = 0.995$ ; mesopore volume ( $V_{\text{meso}}$ , cm<sup>3</sup> g<sup>-1</sup>) was derived from the difference between the total pore volume ( $V_{\text{total}}$ ) and the micropore volume determined from  $t$ -Plot method; average pore diameter ( $D_{\text{pore}}$ , nm) was calculated using BJH method from the desorption branches. Nitrogen adsorption-desorption isotherm data and BJH desorption pore distribution data of the typical sample as-prepared (TEOS 3.0 g as silica source, PAMAM-1G as template) are shown in Table S1 and S2, respectively.

*Figures and experimental data*

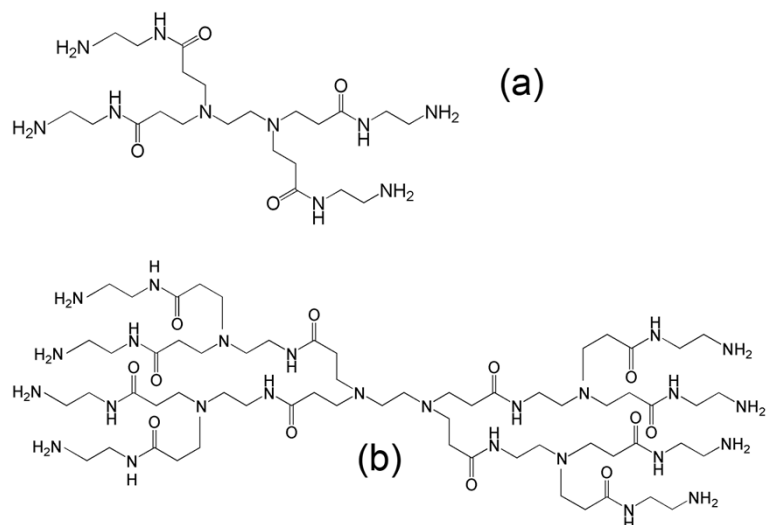

**Fig. S1** Molecular structures of dendrimers: (a) PAMAM-0G and (b) PAMAM-1G.

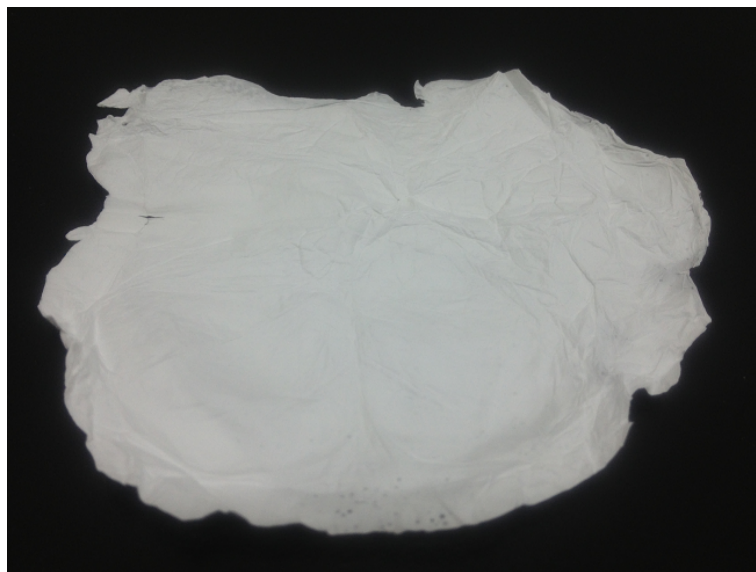

**Fig. S2** Photograph of the product before calcination (TEOS 3.0 g, PAMAM-1G).

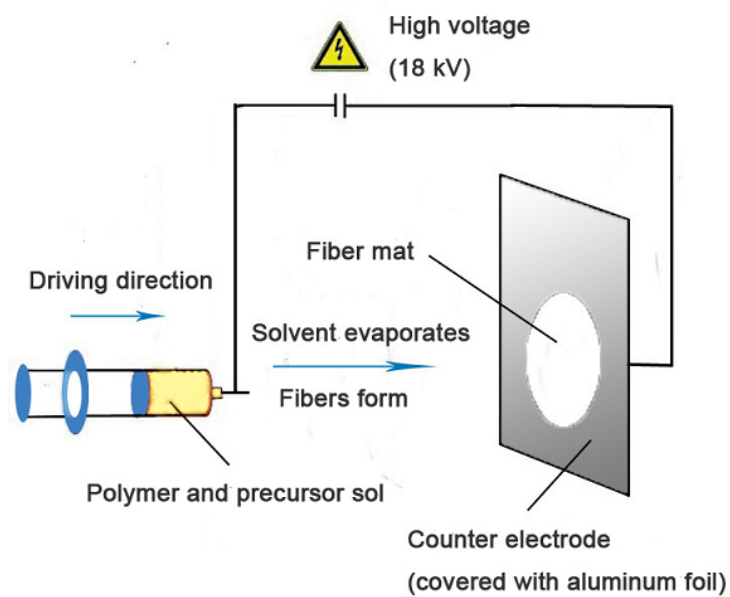

**Fig. S3** The electrospinning process.

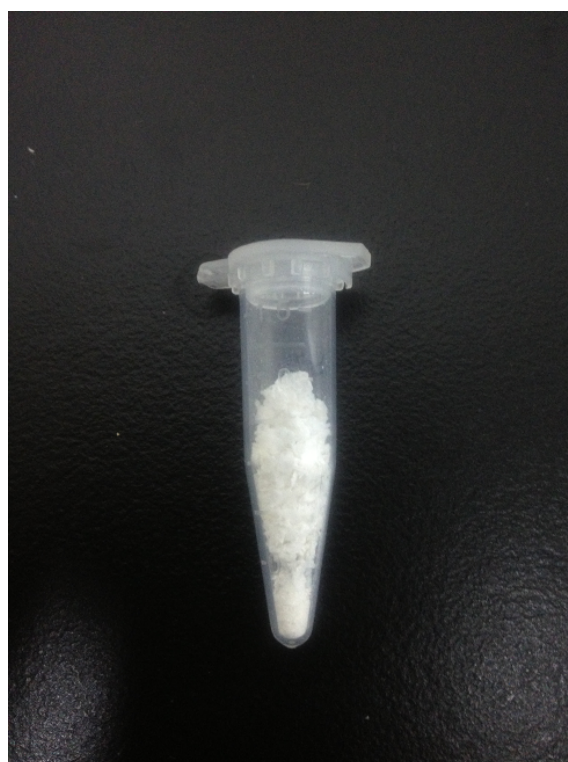

**Fig. S4** Photograph of the product after calcination (TEOS 3.0 g, PAMAM-1G). The product was stored in a plastic tube.

**Table S1** Nitrogen adsorption-desorption isotherm data.

| Relative pressure ( $P/P_0$ ) | Quantity adsorbed ( $\text{cm}^3 \text{g}^{-1}$ ) |
|-------------------------------|---------------------------------------------------|
| 0.00184                       | 104.0474                                          |
| 0.00357                       | 117.3640                                          |
| 0.00720                       | 132.5151                                          |
| 0.01604                       | 151.1314                                          |
| 0.05136                       | 181.6048                                          |
| 0.08183                       | 195.4255                                          |
| 0.12025                       | 207.8763                                          |
| 0.15567                       | 217.1075                                          |
| 0.19120                       | 225.1766                                          |
| 0.22665                       | 232.5915                                          |
| 0.26196                       | 239.6444                                          |
| 0.29701                       | 246.4652                                          |
| 0.33177                       | 253.2763                                          |
| 0.36466                       | 259.8348                                          |
| 0.39955                       | 267.0447                                          |
| 0.43459                       | 274.6163                                          |
| 0.47003                       | 282.7705                                          |
| 0.50497                       | 291.3524                                          |
| 0.53985                       | 300.8055                                          |
| 0.57504                       | 311.1356                                          |
| 0.60946                       | 322.3540                                          |
| 0.64479                       | 335.2661                                          |
| 0.67974                       | 349.7670                                          |
| 0.71463                       | 366.5300                                          |
| 0.74953                       | 386.1236                                          |
| 0.78434                       | 409.4046                                          |
| 0.81940                       | 437.3050                                          |
| 0.85430                       | 469.8634                                          |
| 0.88986                       | 506.1713                                          |
| 0.92641                       | 541.8219                                          |
| 0.96126                       | 569.6638                                          |
| 0.99432                       | 591.8157                                          |
| 0.94530                       | 582.8736                                          |
| 0.90922                       | 576.5541                                          |
| 0.87506                       | 568.3525                                          |
| 0.85579                       | 559.4136                                          |
| 0.82410                       | 534.9546                                          |
| 0.78629                       | 495.1345                                          |
| 0.74734                       | 450.5942                                          |
| 0.71230                       | 414.5089                                          |
| 0.67941                       | 385.8878                                          |

| Relative pressure ( $P/P_0$ ) | Quantity adsorbed ( $\text{cm}^3 \text{g}^{-1}$ ) |
|-------------------------------|---------------------------------------------------|
| 0.64417                       | 361.5264                                          |
| 0.61001                       | 342.4128                                          |
| 0.57493                       | 325.8793                                          |
| 0.53975                       | 311.5714                                          |
| 0.50502                       | 299.2753                                          |
| 0.47074                       | 286.6263                                          |
| 0.43448                       | 275.4054                                          |
| 0.39992                       | 266.8101                                          |
| 0.36532                       | 259.1901                                          |
| 0.33016                       | 251.9109                                          |
| 0.29508                       | 244.7614                                          |
| 0.26000                       | 237.6358                                          |
| 0.22508                       | 230.3871                                          |
| 0.19008                       | 222.8137                                          |
| 0.15517                       | 214.6214                                          |
| 0.12026                       | 205.2772                                          |
| 0.08573                       | 193.9597                                          |
| 0.05092                       | 178.1970                                          |
| 0.01438                       | 145.0730                                          |
| 0.00736                       | 129.9723                                          |
| 0.00381                       | 116.4579                                          |
| 0.00194                       | 104.1164                                          |

**Table S2** BJH desorption pore distribution data.

| Average diameter (nm) | Incremental pore volume (cm <sup>3</sup> g <sup>-1</sup> ) |
|-----------------------|------------------------------------------------------------|
| 1.7                   | 0.01112                                                    |
| 1.9                   | 0.00991                                                    |
| 2.1                   | 0.00942                                                    |
| 2.2                   | 0.00924                                                    |
| 2.4                   | 0.00942                                                    |
| 2.6                   | 0.00975                                                    |
| 2.8                   | 0.01086                                                    |
| 3.1                   | 0.01364                                                    |
| 3.3                   | 0.02061                                                    |
| 3.6                   | 0.02505                                                    |
| 4.0                   | 0.02331                                                    |
| 4.3                   | 0.02809                                                    |
| 4.8                   | 0.03336                                                    |
| 5.3                   | 0.03953                                                    |
| 5.9                   | 0.05162                                                    |
| 6.6                   | 0.06166                                                    |
| 7.4                   | 0.07791                                                    |
| 8.6                   | 0.09540                                                    |
| 10.3                  | 0.08345                                                    |
| 12.6                  | 0.04976                                                    |
| 15.0                  | 0.01760                                                    |
| 18.3                  | 0.01544                                                    |
| 26.1                  | 0.01129                                                    |
| 39.8                  | 0.01600                                                    |
